# Supplementary material for: Bovine tuberculosis prevalence and risk factors in selected districts of Bangladesh
Source: PubMed Central journal article supplement (PMC7654795; doi:10.1371/journal.pone.0241717), 2020-11-10
Supplement: pone.0241717.s005.pdf [file pone.0241717.s005.pdf]

এস ৩ প্রশ্নাবলী। গবাদিপশুতে পাল/দল পর্যায়ে টিবি রোগ সংক্রমণ ঝুঁকি বিষয়ক সার্ভে প্রশ্নমালা

(সাক্ষাৎকার গ্রহণকারী কর্তৃক পূরণকৃত)

|                                        |                                                      |                                                           |
|----------------------------------------|------------------------------------------------------|-----------------------------------------------------------|
| সাক্ষাৎকার গ্রহণের তারিখ: .....        | আইডি নং                                              |                                                           |
| ১। জিপিএস এ ফার্ম এর অবস্থানঃ          | ক) নরথিং                                             | খ) ইসটিং                                                  |
| ২। তথ্য প্রদানকারী ব্যক্তির নাম: ..... |                                                      | মোবাইল নং:                                                |
| ৩। খামারের নামঃ.....                   | ৩.১। খামার স্থাপনের তারিখ                            | ...../...../.....                                         |
| ৪। খামারের অবস্থানঃ                    |                                                      |                                                           |
| গ্রাম/ ওয়ার্ড                         |                                                      | ইউনিয়ন/ পৌরসভা                                           |
| উপজেলা                                 |                                                      | জেলা                                                      |
| ৫। খামারের ধনর                         | দুধ উৎপাদন                                           | ৬। গবাদিপশুতে টিবি আক্রান্ত হবার ইতিহাস আছে কি?           |
|                                        | মাংস উৎপাদন/ হুস্টপুস্টকরণ                           |                                                           |
|                                        | উভয়                                                 | হ্যাঁ                                                     |
|                                        |                                                      | না                                                        |
| ৭। দল/পাল সংকান্ত তথ্যাদি              | ৭.১। পালের আকার                                      | ৮। লালন পালনের প্রকৃতি                                    |
|                                        | ৭.২। জাত ফ্রিজিয়ান ক্রস                             | নিবিড় (গবাদিপশু কোন প্রকার বাহিরে চরানো হয় না)          |
|                                        | শাহীওয়াল ক্রস                                       | আধা নিবিড় (মাবে মধ্যে চরিয়ে খাওয়ানো হয়)               |
|                                        | অন্যান্য ক্রস                                        | পুরোপুরি মাঠে চরিয়ে খাওয়ানো হয়।                        |
|                                        | দেশী জাত                                             |                                                           |
| ৯। গোবর সার ব্যবহার পদ্ধতি             |                                                      | ১০। নিবিড় বা আধা নিবিড় পদ্ধতিতে সাইলেজ খাওয়ানো হয় কি? |
|                                        | কোন প্রকার ট্রিটমেন্ট ছাড়া সরাসরি ব্যবহার করা হয়   | হ্যাঁ                                                     |
|                                        | বাযোগাস প্লাস্টে ব্যবহারের পর স্লারি ব্যবহার করা হয় | না                                                        |
| ১১। পালে নতুন পশু আনা হয়েছে কি?       |                                                      | ১১.১। হ্যাঁ হলে উৎস                                       |
|                                        | হ্যাঁ                                                | এক                                                        |
|                                        | না                                                   | একাধিক                                                    |

১২। ভেটেরিনারি চিকিৎসা সেবা প্রদান করী?

কোয়াক/ প্যারাপ্রফেশনাল

ভেটেরিনারিয়ান

খামারী নিজে

১৪। খামারের জীব নিরাপত্তার ধরণ?

উত্তম

মধ্যম

নিম্ন মানের

১৩।

খামারে অন্য প্রাণি (ছাগল/ভেড়া/ ইত্যাদি) রাখা হয়কি ?

হ্যাঁ

হ্যা
