# Supplementary material for: Bovine tuberculosis prevalence and risk factors in selected districts of Bangladesh
Source: PubMed Central journal article supplement (PMC7654795; doi:10.1371/journal.pone.0241717), 2020-11-10
Supplement: pone.0241717.s007.pdf [file pone.0241717.s007.pdf]

এস ৬ প্রশ্নাবলী। পশু পর্যায়ে টিবি বা যক্ষ্মা সংক্রমণ ঝুঁকি বিষয়ক সার্ভে প্রশ্নমালা  
(সাক্ষাৎকার গ্রহণকারী কর্তৃক পূরণকৃত)

১। গবাদিপশুর ট্যাগ বা আইডি নং

২। পশুর লিংগ

পুং

স্ত্রী

৩। পশুর উৎস ?

খামার

ক্রয়কৃত

৩। পশুর আনুমানিক বয়স

.....মাস

৫। গবাদিপশুর জাত

ফ্রিজিয়ান ক্রস

শাহীওয়াল/সিক্কি ক্রস

অন্যান্য ক্রস (ব্রাহামা/জারসী)

দেশী

৫। আনুমানিক ওজন (কেজি)

<১০০ কেজি

১০০-২০০ কেজি

২০০-৪০০ কেজি

৪০০-৫০০ কেজি

>৫০০ কেজি

৬। গাভী দুধ উৎপাদন করছে কিঃ

হ্যাঁ  
(দুধবতী)  
না (শুষ্ক)

৮। দুধ উৎপাদনের পর্যায়

১ম পর্যায়

২য় পর্যায়

৩য় পর্যায়

৮। গর্ভবতী কিনা?

হ্যাঁ

না

১০। এ পর্যন্ত কত বার বাচ্চা দিয়েছে।

৭। হ্যাঁ হলে দৈনিক দুধ উৎপাদনের পরিমাণ

 লিটার

১১। শারিরিক অবস্থার স্কের (বিসিএস)

খারাপ ( বিসিএসঃ ০-৩)

ভাল (বিসিএসঃ >৬)

মধ্যম (বিসিএসঃ ৪-৬)
